# Supplementary material for: Using the canary genome to decipher the evolution of hormone-sensitive gene regulation in seasonal singing birds
Source: PubMed Central journal article supplement (PMC4373106; doi:10.1186/s13059-014-0578-9), 2015-01-29
Supplement: 13059_2014_578_MOESM1_ESM.pdf [file 13059_2014_578_MOESM1_ESM.pdf]

| Analysis               | Methods       | Canary female | Canary male |            |            | Zebra finch male |   | Major findings                                                     |                                                                                                                                               |
|------------------------|---------------|---------------|-------------|------------|------------|------------------|---|--------------------------------------------------------------------|-----------------------------------------------------------------------------------------------------------------------------------------------|
|                        |               |               | N           | LD samples | SD samples | SD+T samples     | N |                                                                    | samples                                                                                                                                       |
| Genome                 | M1, M2-M9     | 1             |             |            |            |                  |   | 1.2 Gbp genome; 1.69 Mbp W chromosome; 18,818 protein coding genes |                                                                                                                                               |
| RNAseq HVC             | M10, M15, M16 |               | 9           | 3x3*       |            |                  | 9 | 3x3*                                                               | Species-specific AREs and ERs. Enrichment of genes with ARE and ERE in testosterone-sensitive HVC transcriptomes                              |
| RNAseq RA              | M10, M15, M16 |               |             | 2x3*       |            |                  |   | 2x3*                                                               |                                                                                                                                               |
| RNAseq ENT             | M10, M15, M16 |               |             | 3x3*       |            |                  |   | 3x3*                                                               |                                                                                                                                               |
| RNA-microarray HVC     | M11, M15      |               | 18          | 6          | 6          | 6                |   |                                                                    | HVC-differential seasonal testosterone-induced genes are related to neural and neuronal plasticity. Validation of the RNAseq expression data. |
| RNA-microarray RA      |               |               |             | 6          | 6          | 6                |   |                                                                    |                                                                                                                                               |
| RNA-microarray ENT     | M11, M15      |               |             | 6          | 6          | 6                |   |                                                                    |                                                                                                                                               |
| In-situ hybridizations | M12           |               | 6           | 3          | 3          |                  |   |                                                                    | Validation of area-specific gene expression                                                                                                   |
| Protein HVC            | M13-M14       |               | 3           | 1x3*       |            |                  |   |                                                                    | Correlation between gene expression and protein levels of HVC and RA                                                                          |
| Protein ENT            | M13-M14       |               |             | 1x3*       |            |                  |   |                                                                    |                                                                                                                                               |

\* = 3 biological samples were pooled before analysis
