# Supplementary material for: Using the canary genome to decipher the evolution of hormone-sensitive gene regulation in seasonal singing birds
Source: PubMed Central journal article supplement (PMC4373106; doi:10.1186/s13059-014-0578-9), 2015-01-29
Supplement: 13059_2014_578_MOESM2_ESM.pdf [file 13059_2014_578_MOESM2_ESM.pdf]

| <b>aligned species</b>  | <b>CAN sequence covered by collinear regions</b> | <b>largest collinear region</b> | <b>N50 collinear region length</b> | <b>CAN sequence covered by alignment blocks</b> | <b>largest alignment block</b> | <b>N50 alignment block length</b> | <b>average % nucleotide identity of alignment</b> |
|-------------------------|--------------------------------------------------|---------------------------------|------------------------------------|-------------------------------------------------|--------------------------------|-----------------------------------|---------------------------------------------------|
| <b>Ground finch</b>     | 1,007,261,357 (89.03%)                           | 17,993,560                      | 2,357,661                          | 828,553,970 (73.23%)                            | 51,229                         | 4,933                             | 90.47%                                            |
| <b>ZF (no random)</b>   | 975,908,470 (86.26%)                             | 20,770,821                      | 2,198,027                          | 785,773,747 (69.45%)                            | 40,686                         | 3,725                             | 87.97%                                            |
| <b>Adelie penguin</b>   | 995,705,335 (88.00%)                             | 7,648,194                       | 1,330,176                          | 785,296,928 (69.41%)                            | 19,470                         | 1,428                             | 78.67%                                            |
| <b>Emperor penguin</b>  | 1,002,184,706 (88.58%)                           | 10,697,713                      | 1,372,433                          | 783,035,446 (69.21%)                            | 23,230                         | 1,429                             | 78.85%                                            |
| <b>Zebra finch (ZF)</b> | 993,034,350 (87.78%)                             | 9,912,053                       | 1,231,989                          | 776,753,394 (68.66%)                            | 41,519                         | 3,730                             | 87.95%                                            |
| <b>Rock dove</b>        | 998,796,821 (88.28%)                             | 6,988,323                       | 1,087,578                          | 681,040,241 (60.19%)                            | 19,278                         | 1,095                             | 75.76%                                            |
| <b>Budgerigar</b>       | 985,728,753 (87.13%)                             | 9,998,822                       | 1,339,601                          | 648,921,248 (57.36%)                            | 20,965                         | 1,099                             | 75.17%                                            |
| <b>Mallard</b>          | 983,346,013 (86.92%)                             | 3,683,034                       | 742,967                            | 485,488,945 (42.91%)                            | 20,971                         | 839                               | 73.92%                                            |
| <b>Chicken</b>          | 988,238,072 (87.35%)                             | 14,933,872                      | 2,241,173                          | 388,443,473 (34.33%)                            | 18,437                         | 773                               | 73.50%                                            |
| <b>Turkey</b>           | 956,395,519 (84.54%)                             | 3,653,276                       | 599,138                            | 353,305,655 (31.23%)                            | 21,111                         | 740                               | 73.56%                                            |
