# Supplementary material for: Using the canary genome to decipher the evolution of hormone-sensitive gene regulation in seasonal singing birds
Source: PubMed Central journal article supplement (PMC4373106; doi:10.1186/s13059-014-0578-9), 2015-01-29
Supplement: 13059_2014_578_MOESM4_ESM.pdf [file 13059_2014_578_MOESM4_ESM.pdf]

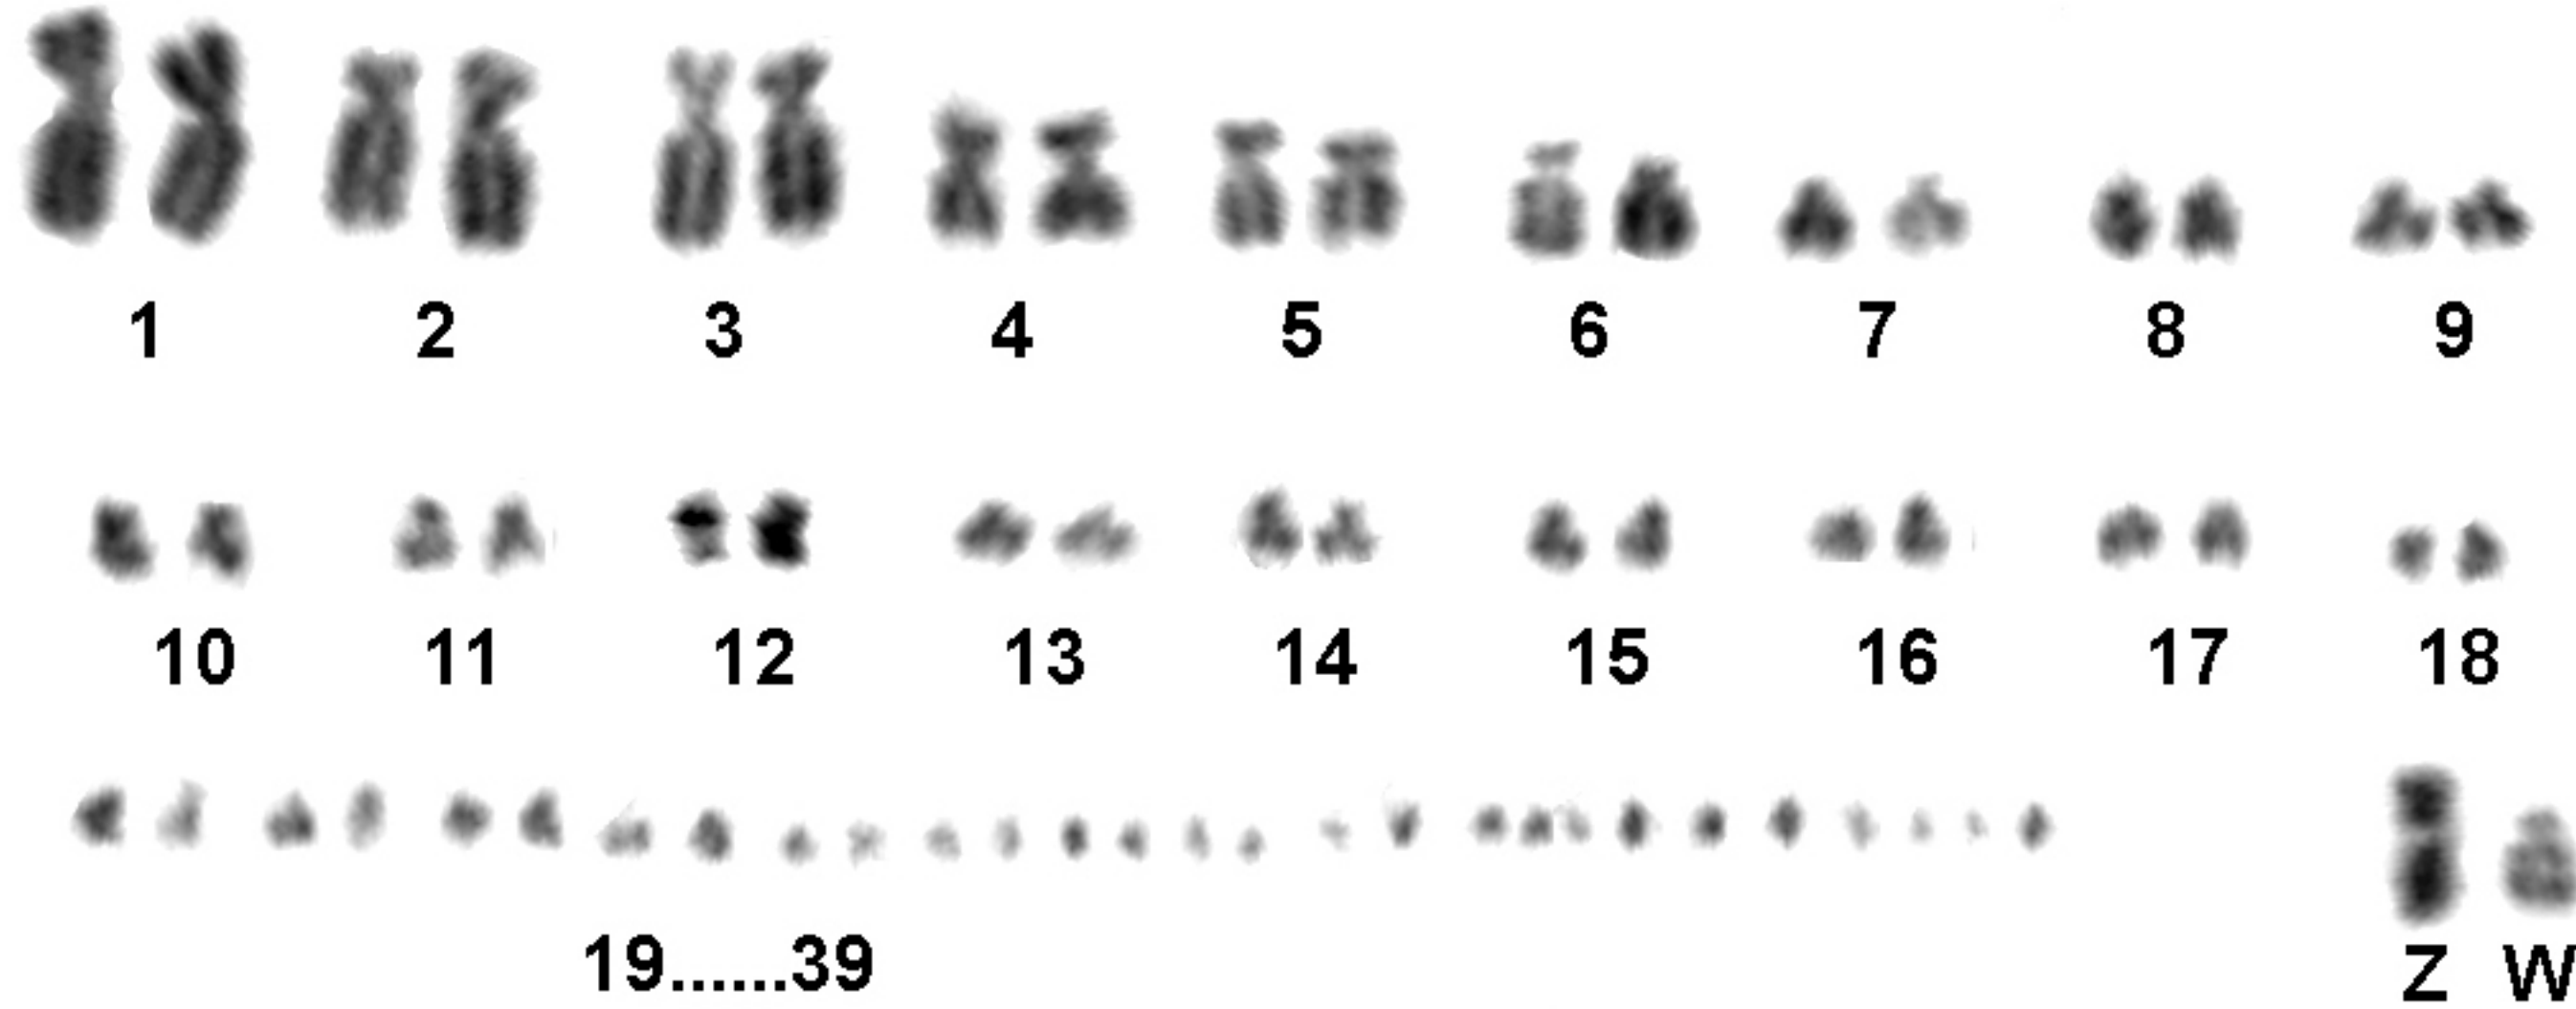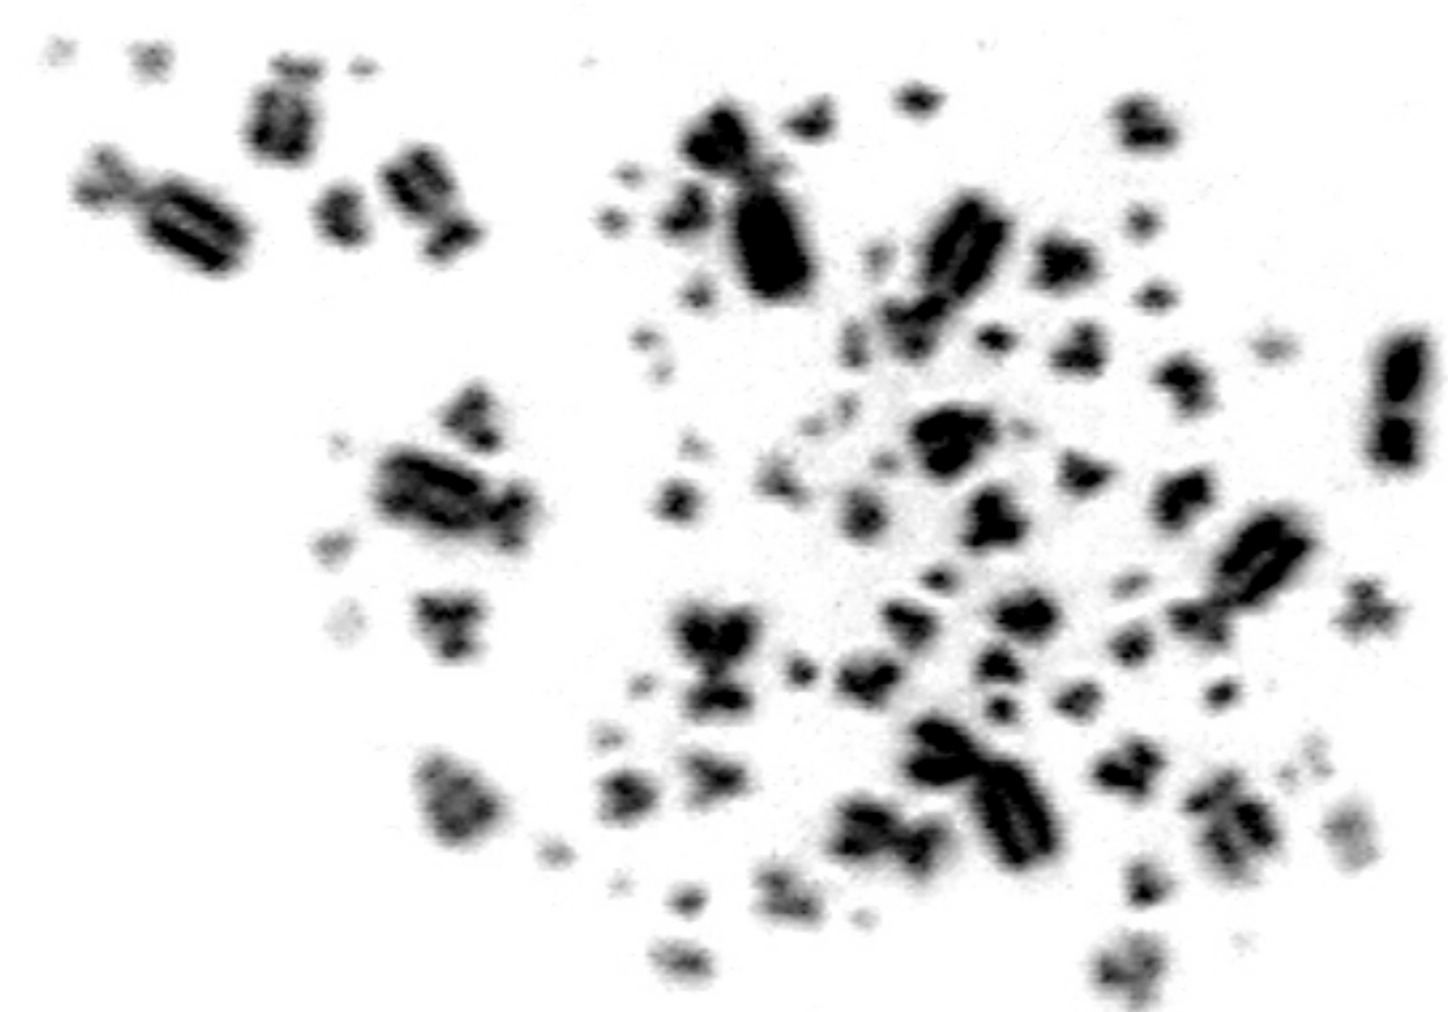

Supp. Fig. 1 - Frankl et al
