# Supplementary material for: Using the canary genome to decipher the evolution of hormone-sensitive gene regulation in seasonal singing birds
Source: PubMed Central journal article supplement (PMC4373106; doi:10.1186/s13059-014-0578-9), 2015-01-29
Supplement: 13059_2014_578_MOESM7_ESM.pdf [file 13059_2014_578_MOESM7_ESM.pdf]

**A****neuron  
differentiation****dendrite  
organization****synapse organization****axon development****B****extracellular structure  
organization****organelle  
organization****cell adhesion****cell cycle process**
